# Supplementary material
Source: PubMed Central journal article supplement (PMC8640830)
Supplement: ajcr0011-5249-f3.pdf [file ajcr0011-5249-f3.pdf]

## AGR2 in development and cancer

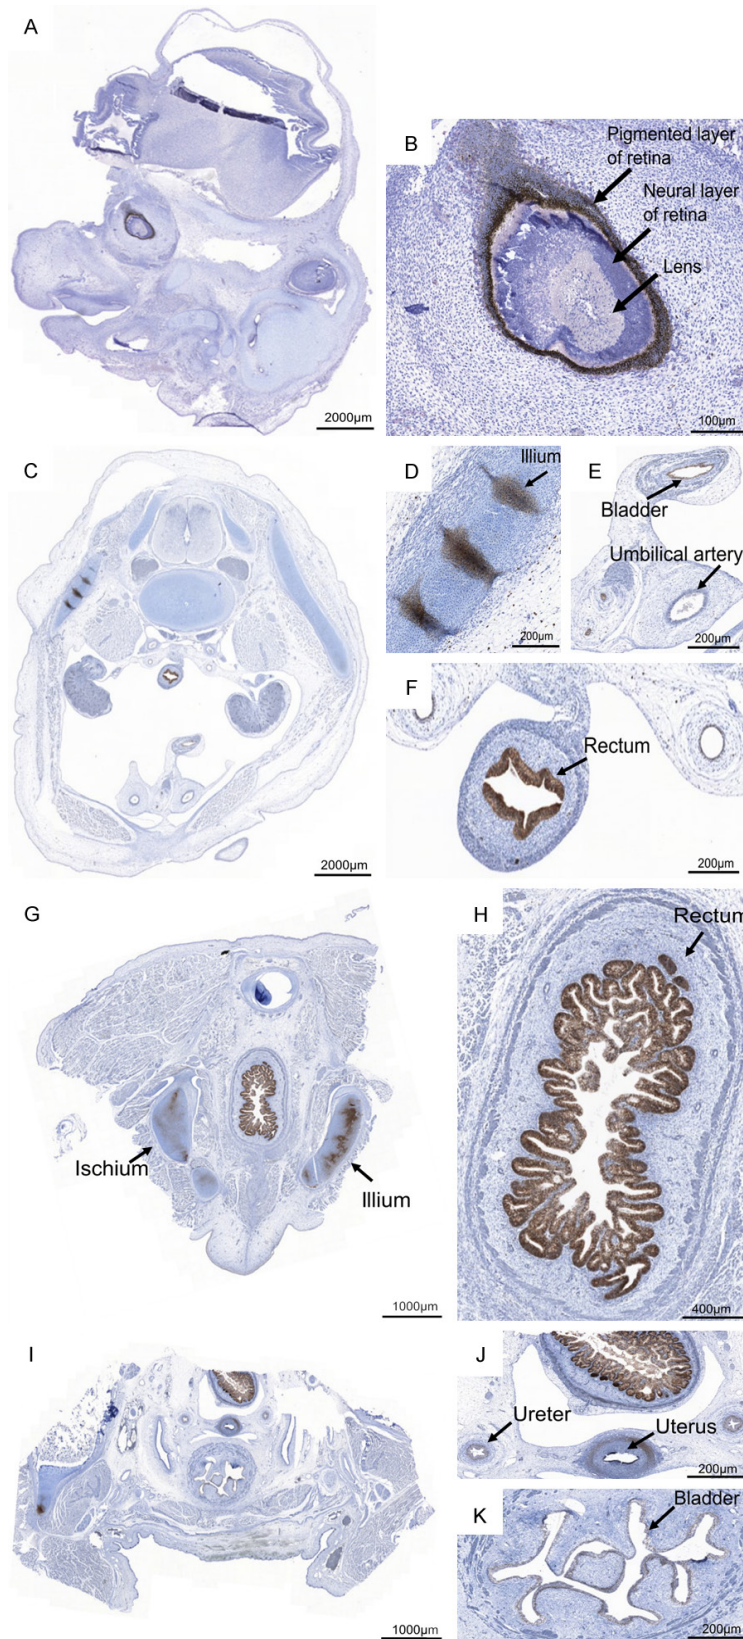

**Supplementary Figure 1.** AGR2 expression across several tissues. Apart from the gastrointestinal tract (shown in **Figure 1**), AGR2 was also found to be expressed across several other human embryonic tissues including: the pigmented layer of the retina in CS22 (A, B); the ilium, common iliac artery, umbilical arteries, rectum, testis, ureters, and bladder in PCW9 (C-F), ischium, ilium, and rectum in PCW12 (G, H); and uterus, ureter and bladder in PCW14 (I-K).
